# Supplementary material for: Quantitative, label-free and site-specific monitoring of molecular recognition: a multivariate resonance Raman approach
Source: Royal Society of Chemistry journal article supplement (doi:10.1039/c0cc02052d), 2010-09-08
Supplement: c0cc02052d.pdf [file c0cc02052d.pdf]

# Quantitative, label-free and site-specific monitoring of molecular recognition: A multivariate resonance Raman approach

Stephan Niebling, Hannes Y. Kuchelmeister, Carsten Schmuck  
and Sebastian Schlücker

## Supplementary Information

1. Experimental electronic absorption spectrum of the receptor CBS-KKF
2. Experimental UV resonance Raman binding study
3. Calculated contributions of free receptor and complex to the experimental spectrum of CBS-KKF and 1.2 eq. of the ligand AE<sub>3</sub>.

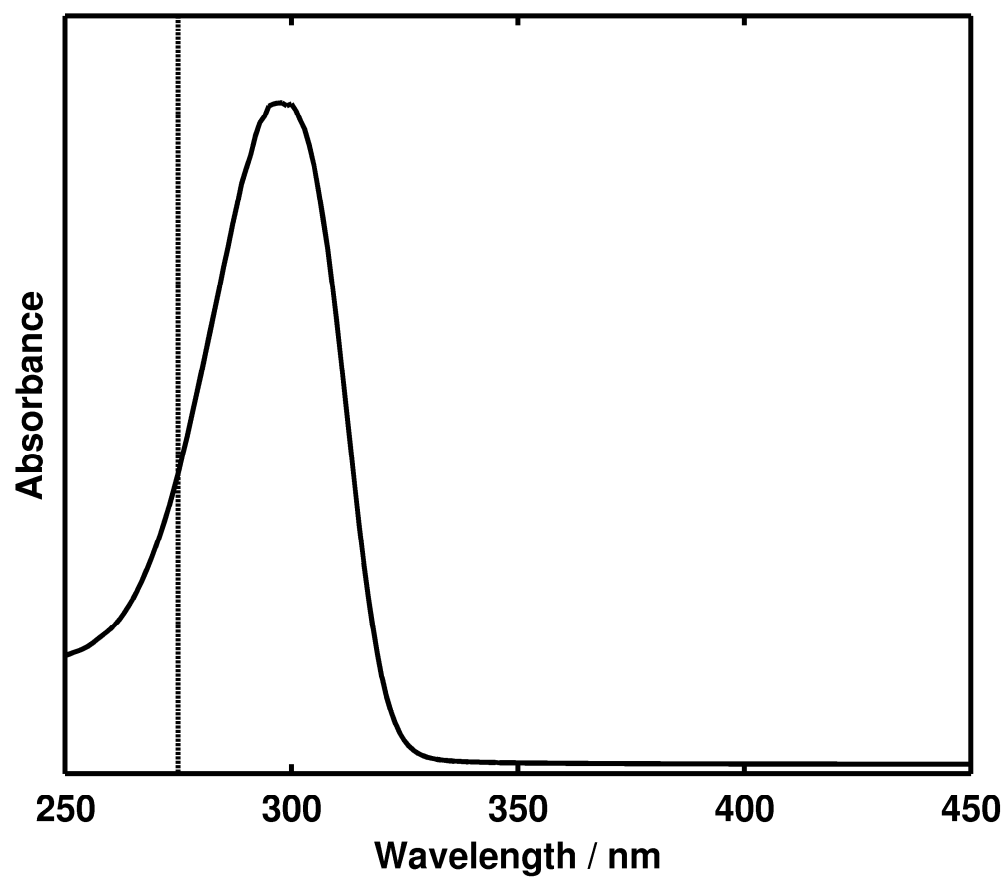

**Fig. S1** Experimental electronic absorption spectrum of the receptor CBS-KKF

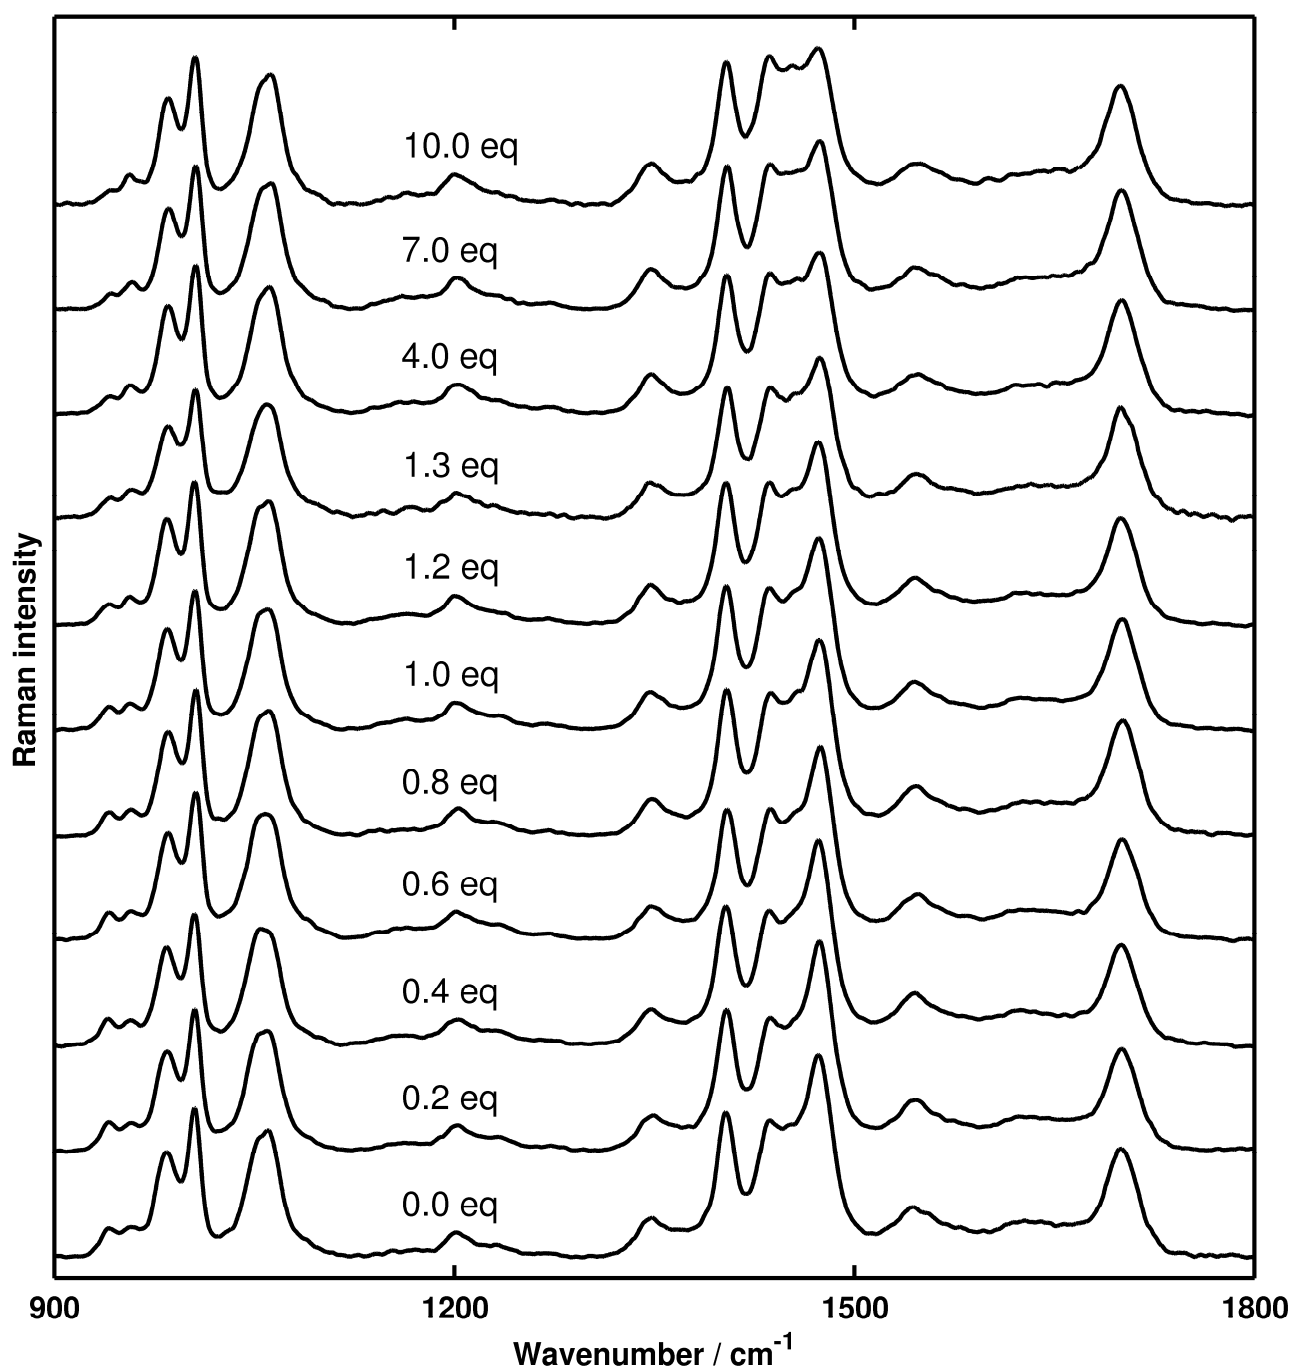

**Fig. S2** Experimental UV resonance Raman spectra ( $\lambda_{\text{exc}} = 275$  nm) of the peptide receptor CBS-KKF ( $c = 1$  mM) at different ligand concentrations ranging from 0 to 10 mM.

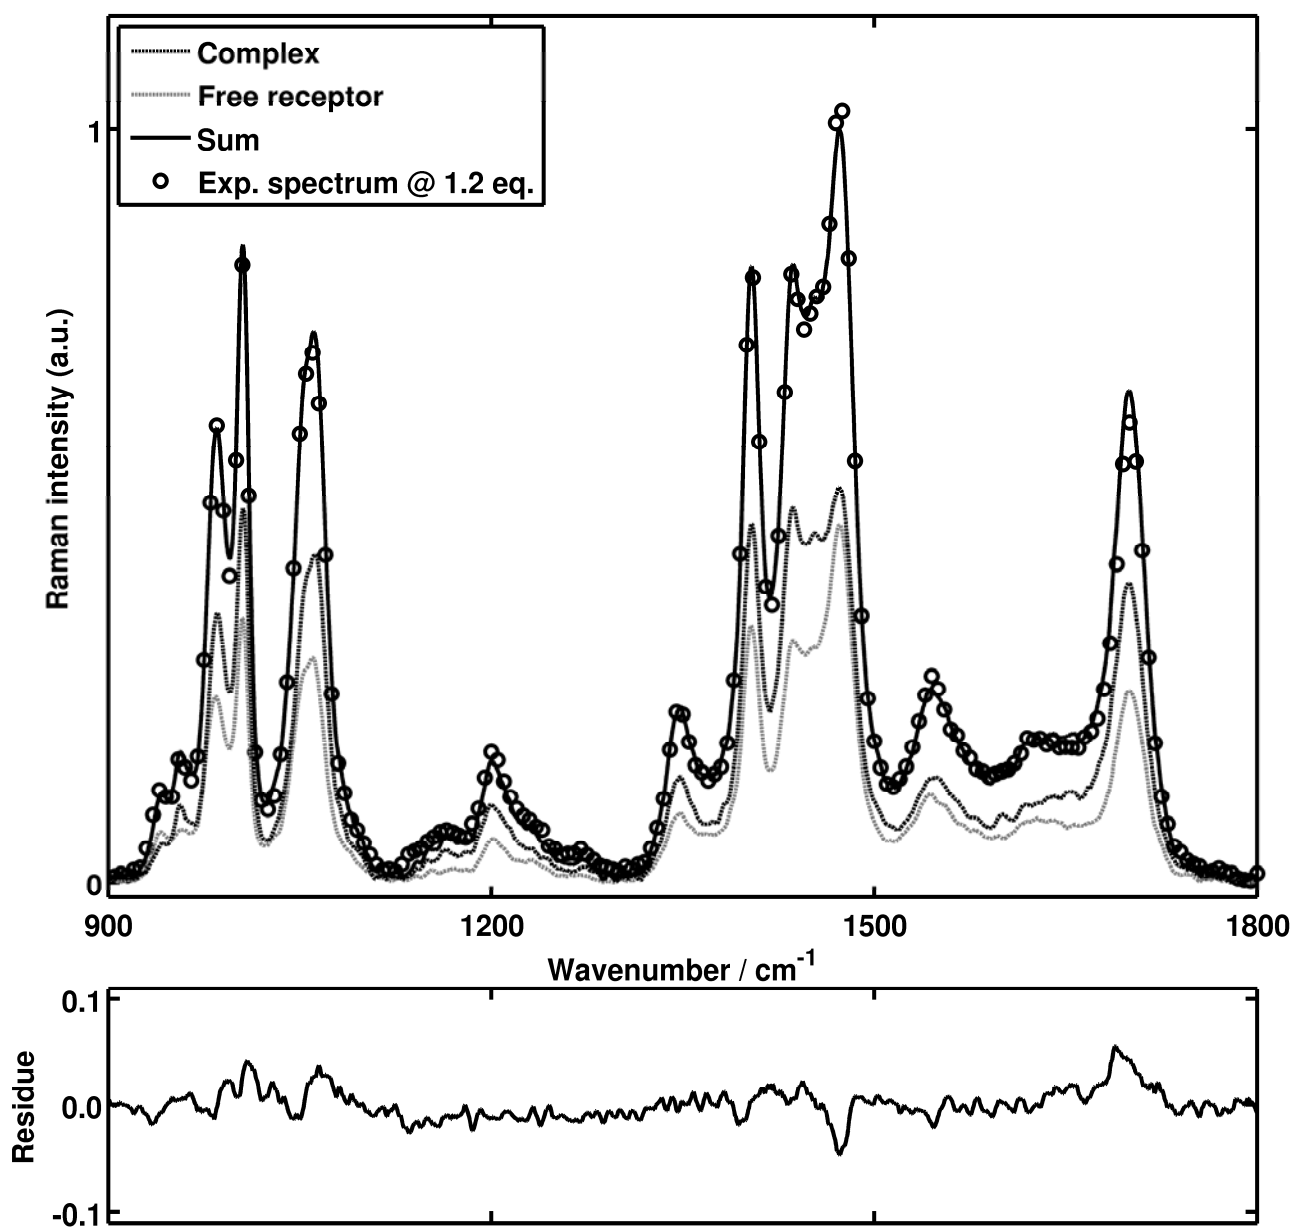

**Fig. S3** Top: Experimental UV resonance Raman spectrum of CBS-KKF ( $c = 1$  mM) in the presence of 1.2 equivalents of the ligand  $\text{AE}_3$  (circles). The contributions of the free receptor and the complex, as determined by non-negative matrix factorization, are denoted as dashed lines, the sum of these contributions is shown as solid line. Bottom: Difference between the sum of the NMF component spectra and the experimental spectrum.
